# Supplementary material for: Synthesis of pyrazoles through catalyst-free cycloaddition of diazo compounds to alkynes
Source: Royal Society of Chemistry journal article supplement (doi:10.1039/b812242c), 2008-12-10
Supplement: b812242c.pdf [file b812242c.pdf]

## Supplementary Information

### Synthesis of pyrazoles through catalyst-free cycloaddition of diazo compounds to alkynes

Daniela VULUGA, Julien LEGROS\*, Benoît CROUSSE and Danièle BONNET-DELPON

#### General methods:

<sup>1</sup>H and <sup>13</sup>C NMR spectra were obtained on a Brücker 300. Chemical shifts  $\delta$  are given in ppm relative to TMS as internal standard. Coupling constant J are measured in Hz. Mass analyses were obtained on an ESQUIRE-LC Brücker.

#### Materials:

All chemicals were used as provided without further purification.

#### Monitoring of the reactions:

The conversion of the substrate into product was measured by integration in the <sup>1</sup>H NMR spectra directly from the reaction mixture.

#### Experimental procedures:

##### *Methyl phenyldiazoacetate 1b*<sup>1</sup>

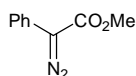

To a mixture of methyl phenylacetate (1.5 g, 10 mmol) and tosyl azide (2 g, 10 mmol) in MeCN (25 mL) at room temperature was added DBU (2 g, 13 mmol). After stirring for 16 h, the reaction mixture was quenched with an aqueous solution of satd NH<sub>4</sub>Cl (25 mL) and extracted with CH<sub>2</sub>Cl<sub>2</sub> (3×30 mL). The combined organic phases were washed with brine (30 mL), dried over MgSO<sub>4</sub> and the solvents were removed in vacuo. The residue was purified through column chromatography over silica gel (cyclohexane/AcOEt, 90:10) to afford **1b** as an orange liquid (60% yield).

<sup>1</sup>H NMR (CDCl<sub>3</sub>, 200 MHz),  $\delta$ : 3.89 (s, 3H); 7.20 (m, 1H); 7.40 (m, 2H); 7.47 (m, 2H)

<sup>13</sup>C NMR (CDCl<sub>3</sub>, 75 MHz),  $\delta$ : 52.0; 124.0; 125.5; 125.8; 128.6; 128.9; 165.6

IR (v, cm<sup>-1</sup>) : 1698, 2081

### 2-Diazo-1-tetralone **1c**<sup>2</sup>

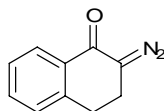

To an ice-cooled solution of MeONa (1.08 g, 20 mmol) and ethyl formate (1.48 g, 20mmol) in benzene (20 mL) was added dropwise a solution of  $\alpha$ -tetralone (1.72 g, 10 mmol) in benzene (20 mL). The mixture was stirred overnight at room temperature. The reaction was quenched with ice-water and then acidified with aqueous HCl (3.0 M). The mixture was extracted with Et<sub>2</sub>O and the combined organic phases were washed with brine and water, dried over MgSO<sub>4</sub>, filtered and the filtrate was evaporated in vacuum to afford the corresponding  $\alpha$ -formyl ketone that was used in the next step without further purification.

To a stirred solution of the above  $\alpha$ -formyl ketone and tosyl azide (2.17 g, 11 mmol) in Et<sub>2</sub>O (20 mL) was added dropwise diethylamine (1.46 g, 20 mmol) at 0 °C. The mixture was allowed to warm to room temperature. After 2 hours, water was added and the mixture was extracted with Et<sub>2</sub>O, washed with brine, dried on MgSO<sub>4</sub>, filtered and the filtrate was evaporated in vacuum. The crude product was purified by chromatography on silica gel (CH<sub>2</sub>Cl<sub>2</sub>) to afford the  $\alpha$ -diazo ketone **1c** as a red solid (40% yield); mp 50-51 °C (lit.<sup>2</sup> 48-49 °C).

<sup>1</sup>H NMR (CDCl<sub>3</sub>, 300 MHz),  $\delta$ : 2.87 (m, 4H); 7.08 (d, J=7.5, 1H); 7.20 (t, J=7.5, 1H); 7.30 (t, J=7.5, 1H); 7.88 (d, J=7.5, 1H)

<sup>13</sup>C NMR (CDCl<sub>3</sub>, 75 MHz),  $\delta$ : 20.2; 27.3; 62.2; 125.3; 126.5; 127.9; 132.1; 132.8; 139.8; 183.1

IR (v, cm<sup>-1</sup>): 1624, 2074

### 2-Diazo-1-indanone **1b**

According to the procedure used for **1c**: 63% yield, orange solid; mp 86 °C (lit.<sup>3</sup> 86.5-88.5 °C).

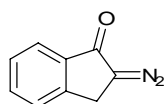

<sup>1</sup>H NMR (CDCl<sub>3</sub>, 300 MHz),  $\delta$ : 4.02 (s, 2H); 7.39 (t, J=7.2, 1H); 7.40 (d, J=7.3, 1H); 7.54 (t, J=7.2, 1H); 7.73 (d, J=7.3, 1H)

<sup>13</sup>C NMR (CDCl<sub>3</sub>, 75 MHz),  $\delta$ : 28.6; 122.6; 125.3; 127.8; 133.1; 137.3; 143.2; 188.4

IR (v, cm<sup>-1</sup>) : 1717, 2071

*Ethyl 3-(4-chlorophenyl)-2-diazo-3-hydroxypropanoate 1e*<sup>4</sup>

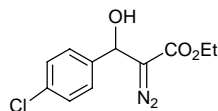

To a mixture of 4-chlorobenzaldehyde (1.4 g, 10 mmol) and ethyl diazoacetate (1.4 g, 12 mmol) in CH<sub>2</sub>Cl<sub>2</sub> (8 mL) was added a solution of DBU (152 mg, 1 mmol) in CH<sub>2</sub>Cl<sub>2</sub> (2 mL). After stirring during 16 h, the solvent was evaporated and the residue was purified through column chromatography over silica gel (cyclohexane/Et<sub>2</sub>O, 80:20) to afford **1e** as a yellow liquid (60% yield).

<sup>1</sup>H NMR (CDCl<sub>3</sub>, 300 MHz), δ: 1.30 (t, J=7.1, 3H); 2.98 (s br, 1H); 4.27 (q, J=7.1, 2H); 5.89 (d, J=3.6, 1H); 7.37 (s, 4H)

<sup>13</sup>C NMR (CDCl<sub>3</sub>, 75 MHz), δ: 14.3; 61.3; 67.9; 68.0; 127.1; 128.8; 134.0; 137.5; 166.3

IR (ν, cm<sup>-1</sup>): 1664, 2094, 3247

*Ethyl 2-diazo-3-oxopropanoate 1f*<sup>5</sup>

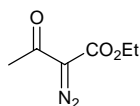

According to the procedure used for **1b**: 60% yield, yellow oil.

<sup>1</sup>H NMR (CDCl<sub>3</sub>, 300 MHz), δ: 1.25 (t, J=7.1, 3H); 2.42 (s, 3H); 4.24 (q, J=7.1, 2H)

<sup>13</sup>C NMR (CDCl<sub>3</sub>, 75 MHz), δ: 14.1; 27.9; 61.26; 76.0; 161.1; 189.9

IR (ν, cm<sup>-1</sup>): 1656, 1713, 2135

**General procedure for the 1,3-dipolar cycloaddition of diazo compounds 1a-f to alkynes:**

A 5 mL round-bottom flask equipped with a reflux condenser was charged with the diazo compound and the alkyne (1 mmol of the heaviest reagent / 1.1 mmol of the most volatile one) and was heated at 80 °C. After completion of the reaction (see Table 2 in the article), the excess of reagent was evaporated under vacuum to afford the corresponding pyrazole as pure solid.

*Diethyl 1H-pyrazole-3,5-dicarboxylate*: 95% yield (from **1a**), 86% (from **1e**, after column chromatography, cyclohexane/AcOEt, 7:3), white crystals; mp 54 °C (lit.<sup>6</sup> 54-55 °C)

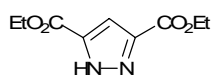

<sup>1</sup>H NMR (CDCl<sub>3</sub>, 300 MHz), δ: 1.26 (t, J=7.1, 6H); 4.30 (q, J=7.1, 4H); 7.23 (s, 1H); 13.02 (s br, 1H)

<sup>13</sup>C NMR (CDCl<sub>3</sub>, 75 MHz), δ: 13.8; 61.3; 111.0; 139.6; 160.3

APCI  $m/z$  (rel.int.): 213  $[M+H]^+$  (60%), 425  $[2M+H]^+$  (100%)

IR ( $\nu$ ,  $\text{cm}^{-1}$ ): 1719, 2984

*Triethyl 1H-pyrazole-3,4,5-tricarboxylate*: 95% yield, pale yellow crystals; mp 92 °C (lit.<sup>7</sup> 90-91 °C)

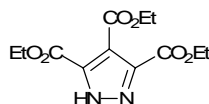

$^1\text{H}$  NMR ( $\text{CDCl}_3$ , 300 MHz),  $\delta$ : 1.30 (t,  $J=7.1$ , 6H); 1.34 (t,  $J=7.1$ , 3H); 4.33 (q,  $J=7.1$ , 4H); 4.37 (q,  $J=7.1$ , 2H); 12.55 (s br, 1H)

$^{13}\text{C}$  NMR ( $\text{CDCl}_3$ , 75 MHz),  $\delta$ : 13.8; 13.9; 61.9; 62.0; 119.5; 137.1; 159.1; 163.1

APCI  $m/z$  (rel.int.): 285  $[M+H]^+$  (100%)

IR ( $\nu$ ,  $\text{cm}^{-1}$ ): 1717, 2985

*Ethyl-5-(trimethylsilyl)-1H-pyrazole-3-carboxylate*<sup>8</sup>: 90% yield, white crystals; mp 142 °C (lit. 143-144 °C)

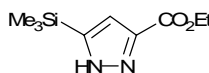

$^1\text{H}$  NMR ( $\text{CDCl}_3$ , 300 MHz),  $\delta$ : 0.24 (s, 9H); 1.23 (t,  $J=7.0$ , 3H); 4.29 (q,  $J=7.0$ , 2H); 6.89 (s, 1H); 12.60 (s br, 1H)

$^{13}\text{C}$  NMR ( $\text{CDCl}_3$ , 75 MHz),  $\delta$ : -1.5; 14.1; 60.6; 115.1; 143.7; 144.2; 162.6

APCI  $m/z$  (rel.int.): 213  $[M+H]^+$  (90%), 425  $[2M+H]^+$  (100%)

IR ( $\nu$ ,  $\text{cm}^{-1}$ ): 1726, 2986

*Ethyl-5-phenyl-1H-pyrazole-3-carboxylate*<sup>9</sup>: 93% yield, white solid; mp 137 °C

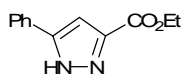

$^1\text{H}$  NMR ( $\text{CDCl}_3$ , 300 MHz),  $\delta$ : 1.32 (t,  $J=7.1$ , 3H); 4.31 (q,  $J=7.0$ , 2H); 7.06 (s, 1H); 7.38 (m, 3H); 7.74 (d,  $J=6.9$ , 2H); 12.13 (s br, 1H)

$^{13}\text{C}$  NMR ( $\text{CDCl}_3$ , 75 MHz),  $\delta$ : 14.1; 61.2; 105.3; 125.6; 128.5; 128.8; 130.5; 139.5; 148.8; 160.8

APCI  $m/z$  (rel.int.): 217  $[M+H]^+$  (100%), 433  $[2M+H]^+$  (30%)

IR ( $\nu$ ,  $\text{cm}^{-1}$ ): 1724, 2963

*3-Ethyl-5-methyl-4-phenyl-1H-pyrazole-3,5-dicarboxylate*: 60% yield (after column chromatography, cyclohexane/AcOEt, 7:3), white solid; mp 107-109 °C

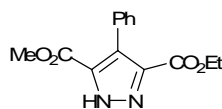

$^1\text{H}$  NMR ( $\text{CDCl}_3$ , 300 MHz),  $\delta$ : 1.34 (t,  $J=7.1$ , 3H); 3.83 (s, 3H); 4.35 (q,  $J=7.1$ , 2H); 7.42 (m, 3H); 7.60 (m, 2H); 11.51 (s br, 1H)

$^{13}\text{C}$  NMR ( $\text{CDCl}_3$ , 75 MHz),  $\delta$ : 13.8; 52.2; 61.4; 112.8; 127.8; 128.2; 128.6; 129.3; 141.1; 146.9; 160.7; 164.4

APCI  $m/z$  (rel.int.): 273  $[\text{M}-\text{H}]^+$  (100%)

IR ( $\nu$ ,  $\text{cm}^{-1}$ ): 1727, 2982

*Ethyl 4,9-dihydro-9-oxopyrazolo[1,5-*b*]isoquinoline-2-carboxylate*: 90% yield, yellow crystals; mp 171 °C

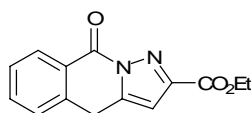

$^1\text{H}$  NMR ( $\text{CDCl}_3$ , 300 MHz),  $\delta$ : 1.41 (t,  $J=7.1$ , 3H); 4.43 (q,  $J=7.1$ , 2H); 4.47 (s, 2H); 6.88 (s, 1H); 7.46 (d,  $J=7.9$ , 1H); 7.52 (t,  $J=7.9$ , 1H); 7.68 (t,  $J=7.9$ , 1H); 8.43 (d,  $J=7.9$ , 1H)

$^{13}\text{C}$  NMR ( $\text{CDCl}_3$ , 75 MHz),  $\delta$ : 14.2; 27.1; 61.6; 107.9; 125.4; 127.9; 128.4; 130.0; 134.3; 136.6; 142.7; 148.3; 157.6; 161.9

APCI  $m/z$  (rel.int.): 257  $[\text{M}+\text{H}]^+$  (100%)

IR ( $\nu$ ,  $\text{cm}^{-1}$ ): 1719

*Diethyl 4,9-dihydro-9-oxopyrazolo[1,5-*b*]isoquinoline-2,3-dicarboxylate* : 85% yield, white solid; mp 115 °C

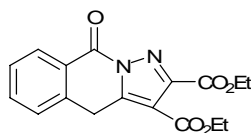

$^1\text{H}$  NMR ( $\text{CDCl}_3$ , 300 MHz),  $\delta$ : 1.38 (t,  $J=7.1$ , 3H); 1.41 (t,  $J=7.1$ , 3H); 4.37 (q,  $J=7.1$ , 2H); 4.45 (q,  $J=7.1$ , 2H); 4.68 (s, 2H); 7.53 (d,  $J=7.7$ , 1H); 7.56 (t,  $J=7.6$ , 1H); 7.73 (t,  $J=7.6$ , 1H); 8.45 (d,  $J=7.7$ , 1H)

$^{13}\text{C}$  NMR ( $\text{CDCl}_3$ , 75 MHz),  $\delta$ : 14.1; 14.2; 28.1; 61.2; 62.3; 112.2; 124.8; 128.3; 128.6; 130.0; 134.7; 136.5; 146.9; 148.5; 157.3; 161.5; 162.2

APCI  $m/z$  (rel.int.): 329  $[\text{M}+\text{H}]^+$  (100%)

IR ( $\nu$ ,  $\text{cm}^{-1}$ ): 1705, 1729

*Ethyl 10-oxo-5,10-dihydro-4H-pyrazolo[1,5-b][2]benzazepine-2-carboxylate* : 88% yield,  
red solid; mp: 115-116 °C

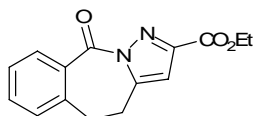

$^1\text{H}$  NMR ( $\text{CDCl}_3$ , 300 MHz),  $\delta$ : 1.41 (t,  $J=7.2$ , 3H); 3.15 (t,  $J=5.2$ , 2H); 3.19 (t,  $J=5.2$ , 2H); 4.42 (q,  $J=7.2$ , 2H); 6.71 (s, 1H); 7.28 (d,  $J=7.5$ , 1H); 7.43 (t,  $J=7.5$ , 1H); 7.54 (t,  $J=7.5$ , 1H); 8.25 (d,  $J=7.5$ , 1H)

$^{13}\text{C}$  NMR ( $\text{CDCl}_3$ , 75 MHz),  $\delta$ : 14.0; 26.8; 32.6; 61.3; 109.6; 127.3; 129.1; 130.1; 133.8; 133.9; 140.7; 146.6; 147.0; 161.5; 163.5

APCI  $m/z$  (rel.int.): 271  $[\text{M}+\text{H}]^+$  (100%)

IR ( $\text{v}$ ,  $\text{cm}^{-1}$ ): 1705

*Diethyl 10-oxo-5,10-dihydro-4H-pyrazolo[1,5-b][2]benzazepine-2,3-dicarboxylate* : 85% yield,  
red oil

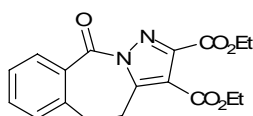

$^1\text{H}$  NMR ( $\text{CDCl}_3$ , 300 MHz),  $\delta$ : 1.35 (t,  $J=7.2$ , 3H); 1.41 (t,  $J=7.2$ , 3H); 3.15 (t,  $J=5.2$ , 2H); 3.52 (t,  $J=5.2$ , 2H); 4.33 (q,  $J=7.2$ , 2H); 4.43 (q,  $J=7.2$ , 2H); 7.31 (d,  $J=7.5$ , 1H); 7.42 (t,  $J=7.5$ , 1H); 7.57 (t,  $J=7.5$ , 1H); 8.19 (d,  $J=7.5$ , 1H)

$^{13}\text{C}$  NMR ( $\text{CDCl}_3$ , 75 MHz),  $\delta$ : 13.7; 13.8; 25.6; 31.9; 60.9; 61.9; 112.8; 127.4; 129.0; 129.8; 133.6; 134.2; 140.5; 147.4; 149.7; 161.6; 162.0; 163.4

APCI  $m/z$  (rel.int.): 343  $[\text{M}+\text{H}]^+$  (100%)

IR ( $\text{v}$ ,  $\text{cm}^{-1}$ ): 1715

*2-Phenyl-4,5-dihydro-10H-pyrazolo[1,5-b][2]benzazepin-10-one* : 40% yield (after column chromatography, cyclohexane/AcOEt, 7:3), red solid; mp: 159-160 °C

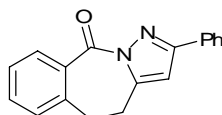

$^1\text{H}$  NMR ( $\text{CDCl}_3$ , 300 MHz),  $\delta$ : 3.14 (t,  $J=5.2$ , 2H); 3.19 (t,  $J=5.2$ , 2H); 6.57 (s, 1H); 7.26 (d,  $J=7.5$ , 1H); 7.43 (m, 4H); 7.52 (t,  $J=7.5$ , 1H); 7.95 (m, 2H); 8.29 (d,  $J=7.5$ , 1H)

$^{13}\text{C}$  NMR ( $\text{CDCl}_3$ , 75 MHz),  $\delta$ : 27.4; 29.7; 106.9; 126.7; 127.4; 128.6; 129.0; 129.3; 131.1; 131.5; 133.4; 134.0; 140.8; 146.8; 155.1; 164.0

APCI  $m/z$  (rel.int.): 275  $[\text{M}+\text{H}]^+$  (100%)

IR (v, cm<sup>-1</sup>): 1693

**General procedure for the 1,3-dipolar cycloaddition of trimethylsilyl diazomethane to alkynes:**

A 5 mL round-bottom flask was charged with trimethylsilyl diazomethane (2M solution in hexane; 0.55 mL, 1.1 mmol) and the alkyne (1 mmol). The mixture was stirred at room temperature (80 °C for phenyl acetylene). After the reaction completion, the excess of reagent and the hexane were evaporated under vacuum to afford the corresponding pyrazole.

*Ethyl 1H-pyrazole-3-carboxylate*<sup>10</sup> : 93% yield, white crystals; mp 158 °C (lit. 158-160 °C)

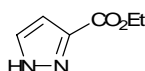

<sup>1</sup>H NMR (CDCl<sub>3</sub>, 300 MHz), δ: 1.41 (t, J=7.1, 3H); 4.43 (q, J=7.1, 2H); 6.84 (d, J=2.3, 1H); 7.85 (d, J=2.3, 1H); 12.96 (s br, 1H)

<sup>13</sup>C NMR (CDCl<sub>3</sub>, 75 MHz), δ: 14.4; 60.9; 107.5; 131.6; 142.4; 162.4

ESI *m/z* (rel.int.): 163 [M+23]<sup>+</sup> (100%)

IR (v, cm<sup>-1</sup>): 1698, 3247

*Diethyl 1H-pyrazole-3,4-dicarboxylate*<sup>10</sup> : 86% yield, pale yellow crystals, mp 70 °C (lit. 69-70 °C)

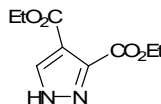

<sup>1</sup>H NMR (CDCl<sub>3</sub>, 300 MHz), δ: 1.34 (t, J=7.1, 3H); 1.39 (t, J=7.1, 3H); 4.31 (q, J=7.1, 2H); 4.44 (q, J=7.1, 2H); 8.23 (s, 1H); 13.88 (s br, 1H)

<sup>13</sup>C NMR (CDCl<sub>3</sub>, 75 MHz), δ: 14.1; 14.2; 60.7; 61.7; 114.7; 135.3; 142.2; 162.0

ESI *m/z* (rel.int.): 235 [M+23]<sup>+</sup> (50%), 447 [2M+23]<sup>+</sup>

IR (v, cm<sup>-1</sup>): 1716, 2985

*3-phenyl-1H-pyrazole*<sup>11</sup> : 87% yield, pale yellow solid; mp 100 °C (lit. 102-104 °C)

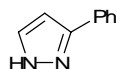

$^1\text{H}$  NMR ( $\text{CDCl}_3$ , 300 MHz),  $\delta$ : 6.62 (d,  $J=2.2$ , 1H); 7.37 (tt,  $J=8.2$  and 1.5, 1H); 7.41 (tt,  $J=8.2$  and 1.4, 2H); 7.61 (d,  $J=2.2$ , 1H); 7.79 (dd,  $J=8.2$  and 1.4, 2H); 11.71 (s br, 1H)

$^{13}\text{C}$  NMR ( $\text{CDCl}_3$ , 75 MHz),  $\delta$ : 102.5; 125.8; 127.9; 128.7; 132.1; 133.2; 149.0

APCI  $m/z$  (rel.int.): 145  $[\text{M}+\text{H}]^+$  (100%)

IR ( $\nu$ ,  $\text{cm}^{-1}$ ): 2964

- 
- 1 J. M. Fraile, J. I. García, J. A. Mayoral and M. Roldán, *Org. Lett.*, 2007, **9**, 731-733.
  - 2 Y. Sato, H. Fusijawa, T. Mukaiyama, *Bull. Chem. Soc. Jpn.*, 2006, **79**, 1275-1287.
  - 3 M. J. Rosenfeld, B. K. Ravi Shankar and H. Shechter, *J. Org. Chem.*, 1988, **53**, 2699-2705.
  - 4 (a) F. Xiao and J. Wang, *J. Org. Chem.*, 2006, **71**, 5789-5791; (b) R. Varala, R. Enugala, S. Nuvula, S. R. Adapa, *Tetrahedron Lett.*, 2006, **47**, 877-880.
  - 5 J. R. Davies, P. D. Kane and C. J. Moody, *Tetrahedron*, 2004, **60**, 3967-3977.
  - 6 L. Iturrino, P. Navarro, M. I. Rodríguez-Franco, M. Contreras, J. A. Escario, A. Martinez and M. del Rosario Pardo, *Eur. J. Med. Chem.*, 1987, **22**, 445-451.
  - 7 R. G. Jones, *J. Am. Chem. Soc.*, 1952, **74**, 4889-4891.
  - 8 M. Barnes, R. Conory, D. J. Miller, J. Miles, J. G. Montana, P. K. Pooni, G. A. Showell, L. M. Walsh and J. B. H. Warneck, *Bioorg. Med. Chem. Lett.*, 2007, **17**, 354-357. Some differences were observed in  $^{13}\text{C}$  NMR when compared to this article: the signal at 143.7 ppm was not reported.
  - 9 T. T. Dang, T. T. Dang, C. Fischer, H. Görls and P. Langer, *Tetrahedron*, 2008, **64**, 2207-2215. This product was described as an oil, and the signal at 105.3 ppm was reported at 116.5 ppm.
  - 10 A. Hanzlowsky, B. Jelenčič, S. Rečnik, J. Svete, A. Golobič and B. Stanovnik, *J. Heterocyclic Chem.*, 2003, **40**, 487-498.
  - 11 V. K. Aggarwal, J. de Vicente and R. V. Bonnert, *J. Org. Chem.*, 2003, **68**, 5381-5383.
